1 | Kinnunen et al.

1 23 Sep 2020

2 Riikka Kinnunen  
3 Biological Sciences Building, University of Manitoba  
4 50 Sifton Rd  
5 Winnipeg, MB, Canada R3T 2N2  
6 kinnuner@myumanitoba.ca

7  
8 Colin Garroway  
9 Biological Sciences Building, University of Manitoba  
10 50 Sifton Rd  
11 Winnipeg, MB, Canada R3T 2N2  
12 (204) 474-8267  
13 colin.garroway@umanitoba.ca

14  
15 RH: Kinnunen et al. • *Toxoplasma Gondii* in Squirrels

16 **No Evidence of *Toxoplasma Gondii* Infection in Urban and Rural Squirrels in Southern**  
17 **Manitoba, Canada**

18 RIIKKA P. KINNUNEN,<sup>1</sup> *Department of Biological Sciences, Biological Sciences Building,*  
19 *University of Manitoba, Winnipeg, MB, Canada R3T*

20 CHLOÉ SCHMIDT,<sup>1</sup> *Department of Biological Sciences, Biological Sciences Building,*  
21 *University of Manitoba, Winnipeg, MB, Canada R3T*

22 ADRIÁN HERNÁNDEZ-ORTIZ,<sup>2</sup> *Department of Veterinary Microbiology, Western College*  
23 *of Veterinary Medicine, University of Saskatchewan, 52 Campus Drive, Saskatoon, SK,*  
24 *Canada S7N 5B4*

---

<sup>1</sup> *Email:* kinnuner@myumanitoba.ca

25 COLIN J. GARROWAY, <sup>1</sup> *Department of Biological Sciences, Biological Sciences Building,*  
26 *University of Manitoba, Winnipeg, MB, Canada R3T*

27 **ABSTRACT**

28 When wildlife colonizes cities, they can bring parasites that have implications for human  
29 health, yet knowledge underlying the ways host-pathogen interactions operate in cities is  
30 limited. The Coccidian parasite *Toxoplasma gondii* can infect humans and cause health issues.  
31 *T. gondii* also has host species that occur at higher densities in cities than in natural  
32 environments, including squirrel species (Sciuridae). Cats and other Felidae are the only  
33 known definitive hosts of *T. gondii*. In urban and suburban areas squirrels regularly share  
34 their territories with domestic cats where they can encounter infectious oocysts shed in cat  
35 feces in contaminated soil or in the food they eat. We hypothesized that urban squirrels might  
36 thus be particularly susceptible to *T. gondii* infection compared to squirrels in more natural  
37 areas. We investigated this using molecular and serological methods on samples collected  
38 from four squirrel species in and around the city of Winnipeg, Manitoba, Canada. We tested a  
39 total of 272 tissue samples from 46 squirrels for *T. gondii* DNA using quantitative PCR, and  
40 15 serum samples from grey squirrels (*Sciurus carolinensis*) for *T. gondii* antibodies (IgG) by  
41 indirect ELISA. We found no evidence of *T. gondii* infection in squirrels in southern  
42 Manitoba. This suggests that squirrels are not important intermediate hosts of *T. gondii* in  
43 cities and that the prevalence of *T. gondii* oocysts in the environment in Manitoba is likely  
44 low. Consequently, squirrel management to prevent infection to humans or their pet cats is not  
45 needed in urban areas with abundant squirrel populations.

46 **KEY WORDS** host-parasite interaction, Sciuridae, squirrel, *Toxoplasma gondii*,  
47 urbanization

48

#### 49 **INTRODUCTION**

50 When wildlife colonizes cities, they can bring parasites that have implications for human  
51 health (Mackenstedt et al. 2015). Indeed, previous work has found increased levels of wildlife  
52 parasitism in cities compared to rural areas (Deplazes et al. 2004; Reperant et al. 2009; Lehrer  
53 et al. 2010; Giraudeau et al. 2014). This increased level of parasitism could reflect both the  
54 increased population density of urban host species and higher within and between species  
55 contact rates in response to resource provisioning in cities relative to rural areas (Gliwicz et  
56 al. 1994; Bradley and Altizer 2007). Contrasting this pattern, in some cases the overall species  
57 richness and diversity of parasites can be reduced in cities as parasites with one or a few host  
58 species may become extirpated in conjunction with their host species (Bradley and Altizer  
59 2007). Parasites that spread through direct contact or oral-fecal routes are likely to be favored  
60 in urban areas (Bradley and Altizer 2007) but knowledge underlying the way host-pathogen  
61 interactions operate in cities is still limited (Mackenstedt et al. 2015).

62

63 The Coccidian parasite *Toxoplasma gondii* is an interesting parasite within the context of  
64 emerging urban ecosystems. This is because it can infect humans and cause health issues, and  
65 it has multiple host species that occur in high densities in cities including pets and rodents,  
66 with wild and domestic cats (Felidae) being the only known definitive hosts (Elmore et al.

67 2010). A significant proportion of the human population globally is infected with *T. gondii*,  
68 but most healthy people do not experience symptoms of infection (review by Tenter et al.  
69 2000). However, immunocompromised people and pregnant women require medical  
70 intervention to avoid serious health issues (Dixon 1992; Tenter et al. 2000; Hill et al. 2005).  
71 Consequently, further knowledge of *T. gondii* infection dynamics in cities is needed.

72

73 *T. gondii* has three infectious stages: the tachyzoites, the bradyzoites, and the sporozoites (Hill  
74 et al. 2005). The ovoid-shaped tachyzoite can be found inside a host's cells surrounded by a  
75 parasitophorous vacuole that protects it from the host defense mechanisms (Hill et al. 2005).  
76 This is an active infection stage where the tachyzoites increase within the host body and  
77 spread via the bloodstream. After pressure from the host's immune system, intracellular tissue  
78 cysts called bradyzoites then form, generally in visceral organs and neural and muscular  
79 tissue- particularly the brain, eye, and skeletal and cardiac muscle (Berdoy et al. 2000; Tenter  
80 et al. 2000; Hill et al. 2005). This is a chronic infection stage, where the bradyzoites remain  
81 within host tissue possibly for the rest of the host's life. When cats feed on infected  
82 intermediate hosts, such as rodents, the bradyzoites are released and spread to the intestinal  
83 epithelium of the cat for sexual reproduction (Pappas et al. 2009). When a gamete is fertilized,  
84 a wall forms around it, making the formed oocyst highly resistant to environmental changes  
85 (Dubey et al. 1970). Following this hardening of the oocyst, domestic cats and other Felidae  
86 then spread them in the environment in their feces: millions of oocysts can be shed daily for  
87 the duration of one to two weeks (Dubey 2001; Fayyad et al. 2016). Each oocyst contains two

88 sporocysts that each contain four sporozoites—the last infectious stage of *T. gondii* (Hill et al.  
89 2005). Cats and intermediate hosts can become infected by consuming carcasses infected by  
90 *T. gondii* cysts, or by coming into contact with oocyst contaminated soil, water, or food.  
91  
92 Urbanization can increase the risk of an animal being exposed to *T. gondii* (Conrad et al.  
93 2005; Lehrer et al. 2010; Ballash et al. 2015). Many squirrel species (Sciuridae) are  
94 ubiquitous in cities, where they are commonly found at much higher densities than in natural  
95 environments (Parker and Nilon 2008). In urban and suburban areas squirrels regularly share  
96 their territories with domestic cats (Baker et al. 2008; Sims et al. 2008) and collect and cache  
97 their food in backyards and gardens where they can easily encounter infectious oocysts shed  
98 in cat feces in contaminated soil or in the food they eat. This may make urban squirrels  
99 particularly susceptible to parasite infection compared to their rural counterparts. After being  
100 infected squirrels act as intermediate hosts for the parasite, and the parasite can remain within  
101 the host body in tissue cysts for the rest of the host’s life. The infection can be asymptomatic,  
102 or squirrels can acquire toxoplasmosis (Dubey et al. 2006; Jokelainen and Nylund 2012).  
103 Many *T. gondii* strains isolated from nature are of low virulence, leading to subclinical, mild  
104 toxoplasmosis that may not kill the animal, but can make prey—such as a squirrel—  
105 susceptible to predation by cats (Dubey and Frenkel 1973), thus enabling the parasite to  
106 complete its life cycle (Dubey and Frenkel 1973; Dubey et al. 2006). Squirrels may thus act as  
107 a source of infection to cats, in a similar way to other prey species (Afonso et al. 2007). As  
108 such squirrels may play a role in *T. gondii* population and infection dynamics in cities. Our

109 aim in this paper was to survey the prevalence of *T. gondii* infection in squirrel (Sciuridae)  
110 populations in and around the city of Winnipeg, Manitoba, Canada. We specifically asked  
111 whether squirrels are important intermediate hosts of *T. gondii* and whether *T. gondii*  
112 infection is more common in a city than in more natural habitats.

113

114 *T. gondii* has been found in many wild animals particularly in farms and natural areas (e.g.,  
115 Tizard et al. 1978; Smith and Frenkel 1995; Gray fox (*Urocyon cinereoargenteus*), Lindsay et  
116 al. 2001; Red fox (*Vulpes vulpes*), Wanha et al. 2005), yet we know relatively little about the  
117 prevalence of *T. gondii* in wild animals in cities (but see e.g., Frenkel et al. 1995; Conrad et  
118 al. 2005; Murphy et al. 2008; Lehrer et al. 2010; Mercier et al. 2013; Dubey et al. 2014;  
119 Ballash et al. 2015). Squirrels are among the many species capable of getting a *T. gondii*  
120 infection, but our knowledge is limited, and studies have mostly focused on acute, fatal cases  
121 with little information existing on host-pathogen dynamics during chronic, latent infection  
122 (Jokelainen and Nylund 2012). Toxoplasmosis has been found in the Eastern grey squirrel  
123 (*Sciurus carolinensis*; Jacobs et al. 1962 (2/24 positive individuals); Walton and Walls 1964  
124 (1/8); Smith and Frenkel 1995 (2/5); Dubey et al. 2006 (3/3)), Western grey squirrel (*Sciurus*  
125 *griseus*; Soave and Lennette 1959 (1/1)), and Eurasian red squirrel (*Sciurus vulgaris*;  
126 Jokelainen and Nylund 2012 (3/19); Fayyad et al. 2016 (1/1)). The sample size in these  
127 studies has typically been low and none examined the prevalence of *T. gondii* in urban  
128 squirrels.

129

130 Due to the zoonotic nature of *T. gondii* and its negative effects on pregnant women, children  
131 and people with compromised immune systems monitoring of the various sources of infection  
132 risk is important. Public health organizations, such as the World Health Organisation  
133 recommend epidemiological data collection of *T. gondii*, yet regular monitoring of the  
134 infection in humans or animals is rare. We hypothesized that, due to higher population  
135 densities of both squirrels and cats in cities, urban squirrels may act as intermediate hosts of  
136 *T. gondii* and that urban squirrels will have a higher prevalence of *T. gondii* infection than  
137 rural squirrels. We tested these hypotheses by using molecular and serological methods on  
138 samples collected from squirrels in and around the city of Winnipeg, Manitoba, Canada.

139

#### 140 **STUDY AREA**

141 We conducted live trapping of red (*Tamiasciurus hudsonicus*) and grey squirrels (*Sciurus*  
142 *carolinensis*) in one urban and one rural site between 5<sup>th</sup> June and 1<sup>st</sup> August 2019 (Fig. 1).  
143 The urban site is located in the city of Winnipeg, Manitoba, Canada, and consists of an ~10 ha  
144 park located on the University of Manitoba campus and a suburban neighborhood next to the  
145 park. The study site is bordered by the Red River and two major highways with high amounts  
146 of car traffic. Winnipeg is the largest city in the province of Manitoba with a population of  
147 778,489 and a total land area of 464,33 km<sup>2</sup> (Statistics Canada 2016). Winnipeg lies 239  
148 meters above sea level and has high seasonal climatic variation, with temperature varying  
149 from the extremes of around -24 °C to -33 °C between January to March to around +30 °C to  
150 +35 °C between June to September (Environment Canada 2020b). The rural site is a ~34 ha

151 forest patch next to an active honey-farm, near the twin cities Morden and Winkler in  
152 southern Manitoba (49°24'01.1"N, 98°00'29.2"W), bordered by agricultural land.

153

## 154 **METHODS**

155 We used live traps (Tomahawk Live Trap Co., Tomahawk, WI, USA) to capture squirrels at  
156 the study sites. After capture, squirrels were handled in a canvas capture bag and we recorded  
157 the weight (g), body and tail length (cm), skull width (cm), age (adult or juvenile),  
158 reproductive status, and sex for each individual. We collected a minimum of 500 µL of blood  
159 from the femoral vein of each squirrel and stored the sample on ice until processing. Each  
160 squirrel was pit tagged between the shoulder blades with passive integrated transponder (PIT)  
161 tags. Squirrels were then released at the place of capture. Our protocol was approved by the  
162 University of Manitoba animal care and use committee.

163 We also collected squirrel carcasses from trappers, wildlife rehabilitation centers, and pest  
164 control companies during the years of 2017 to 2019. Twenty of the carcasses were from urban  
165 locations within Winnipeg, 20 from rural locations approximately 30 to 250 km from  
166 Winnipeg (Fig 2). Six carcasses were from unknown locations from Manitoba. We had 25  
167 American red squirrels (*Tamiasciurus hudsonicus*); 16 Eastern grey squirrels (*Sciurus*  
168 *carolinensis*); four Northern flying squirrels (*Glaucomys sabrinus*); and one Least chipmunk  
169 (*Neotamias minimus*).



170 To best detect *T. gondii* whether in an acute or chronic stage and to follow recommendations  
171 from previous studies (see review by Galeh et al. 2020), we combined molecular and  
172 serological methods to investigate *T. gondii* prevalence in squirrels.

173

#### 174 **Molecular Methods**

175 Upon necropsy, we collected the entire liver, spleen, brain, heart, kidneys, and lungs, and  
176 stored tissues separately at  $-20^{\circ}\text{C}$  until further analysis. As *T. gondii* is a cyst-forming  
177 parasite, the detection probability of *T. gondii* can differ between organs (Elmore et al. 2016).  
178 Consequently, we tested multiple samples per individual from two to six different organs to  
179 maximize the probability of detecting the parasite.

180 *Cell lysis.*—Cell lysis was done by first adding 3 ball bearings to each 2 mL screw-cap  
181 tube containing 0.6 mL of ATL buffer, and adding 100 mg of frozen tissue or pipetting 0.1  
182 mL of sample (if liquid such as thawed brain) to the tube. We placed the samples in a  
183 BeadBeater for 3 minutes after which they were quickly centrifuged. We added 70  $\mu\text{L}$  of  
184 Proteinase K to the ATL lysate. We incubated the lysate at  $+56^{\circ}\text{C}$  for 1-3 hours during which  
185 the tubes were intermittently inverted several times. We centrifuged the lysate quickly and  
186 added 0.6 mL of AL buffer. We inverted the tubes several times and incubated at  $+70^{\circ}\text{C}$  for  
187 10-30 minutes in a dry block. We then again inverted the tubes intermittently several times.  
188 The samples were then centrifuged for 3 minutes at  $10,000 \times g$ . After the completion of the  
189 cell lysis, we used 100  $\mu\text{L}$  of the ATL/ProtK/AL lysate to continue the extraction.

190           *Nucleic acid extraction and real-time PCR.*—We did nucleic acid extraction for *T.*  
191 *gondii* using 5X MagMAX viral Isolation kit (Applied Biosystems AMB1836-5). Primers and  
192 probes for real-time PCR were designed according to the protocol of De Craeye et al. (2011)  
193 (see SI Table S1 for primers and probes). PCR product size was 106 bp. We used cellular  
194 r18S (ribosomal RNA gene) as an internal control of all PCRs. Real-time PCR was conducted  
195 using TaqMan Fast Advanced Master Mix (Applied Biosystem) in Applied Biosystems™  
196 7500 Real-Time PCR System. Each PCR reaction had concentrations of 10 µM of T2 /F  
197 primer, 10 µM of T3/R primer, and 5 µM of probe in the master mix. Thermo cycling  
198 Program: Initial denaturation and activation of the Taq polymerase at +95 °C for 2 minutes,  
199 followed by 45 cycles at +95 °C for 5 seconds and +60 °C for 33 seconds. We analyzed the  
200 results using 7500 System SDS Software.

201

## 202 **Serological Methods**

203 We collected a minimum of 500 µL of blood from 15 individual grey squirrels and stored  
204 samples on ice. All samples were processed within 12 hours. We centrifuged the collected  
205 blood samples at 3500 rpm for 15 minutes and froze the serum at –20 °C until used for  
206 testing.

207           *Enzyme-linked immunosorbent assay.*—We used enzyme-linked immunosorbent  
208 assays (ELISA) to detect serum antibodies (IgG) against *T. gondii*. As species-specific  
209 conjugates are not available for squirrels, a commercially available ELISA kit was used for  
210 testing the samples (Multi-species ID Screen Toxoplasmosis Indirect kit, IDVet, Grabels,

211 France) following manufacturer's instructions. Briefly, we diluted samples and negative and  
212 positive kit controls in a 1:10 ratio on sample dilution buffer. Then, we transferred 100 µL of  
213 the diluted sample to each well by duplicates, incubated the plate for 45 minutes at room  
214 temperature, and washed 3 times. We diluted conjugate in a 1:20 ratio and added 100 µL of  
215 the conjugate to each well. The plate was then incubated at room temperature for 30 minutes  
216 and washed 3 times again. Afterward, we added 100 µL of substrate solution to each well and  
217 incubated the plate for 15 minutes in the dark at room temperature. The reaction was stopped  
218 by adding 100 µL of stop solution to each well and the plate was read at 450 nm in a  
219 spectrophotometer. Results were calculated using the optical density (OD) values of the  
220 samples and kit controls and expressed as S/P (Sample to Positive Ratio) percentage (S/P%)  
221 using the following formula

$$222 \quad (OD_{\text{sample}} - OD_{\text{NC}})$$
$$223 \quad S/P\% = \frac{\quad}{\quad}$$
$$224 \quad (OD_{\text{PC}} - OD_{\text{NC}})$$

225 where NC is negative control and PC positive control.

226 We considered samples with S/P% less or equal to 40% negative; samples with S/P% between  
227 40 and 50% doubtful or inconclusive; and samples with an S/P% higher than 50% positive,  
228 following the kit's protocol. The multi-species ELISA kit we used has been successfully used  
229 to detect *T. gondii* antibodies in wildlife (Roqueplo et al. 2011; Sharma et al. 2019b), has high  
230 sensitivity and specificity, and does not cross-react with other coccidian parasites—a factor  
231 known to limit the specificity of serological assays (Hirota et al. 2010).

232

## 233 **RESULTS**

234 We tested a total of 272 tissue samples from 46 squirrels from four squirrel species for *T.*  
235 *gondii* DNA using quantitative PCR. *T. gondii* DNA was not detected on any of the 272 tissue  
236 samples on any of the organs (liver; heart; brain; lung; spleen; kidney) sampled from any of  
237 the 46 squirrels.

238 We also tested a total of 15 samples of blood sera from grey squirrels for *T. gondii* antibodies  
239 (IgG) by indirect ELISA. Two of the samples did not have enough volume for testing. The  
240 results were negative—no *T. gondii* antibodies were detected in any sample (see SI Table S2).

241

## 242 **DISCUSSION**

243 We hypothesized that, due to higher population densities of both squirrels and cats in cities,  
244 urban squirrels may act as intermediate hosts of *T. gondii* and have a higher prevalence of *T.*  
245 *gondii* infection than rural squirrels. However, we found no evidence of *T. gondii* infection in  
246 squirrels in southern Manitoba.

247

248 Studies investigating *T. gondii* infection dynamics in cities are still relatively rare considering  
249 the parasite can infect most mammalian species, including humans, and wildlife can act as  
250 reservoirs for the parasite and as sources of infection. Our study is currently one of the very  
251 few studies that have explored the prevalence of *T. gondii* in Sciurids in urban areas. One  
252 earlier study from Guelph, Ontario, Canada found no evidence of infection across nine

253 locations within and around the city from grey squirrels (*Sciurus carolinensis*, n= 16, the  
254 number of urban captures not specified) and chipmunks (*Tamias striatus*, n= 6) using the  
255 Sabin-Feldman dye test (Tizard et al. 1978). Using serological techniques with bioassay and  
256 PCR together can give a more reliable estimation of infection rate (Galeh et al. 2020), as the  
257 distribution of *T. gondii* tissue cysts can be uneven and vary between organs (Elmore et al.  
258 2016) which can lead to detection difficulties using PCR-based methods (Opsteegh et al.  
259 2010). The sensitivity and specificity of antibody detection methods can also vary, which can  
260 lead to misinterpretation of results and possible false negatives or false positives (Gilbert et al.  
261 2013). Work in natural or rural areas also suggests *T. gondii* prevalence in squirrels is low  
262 (Jacobs et al. 1962; indirect hemagglutination test: 1 of 265, Burr ridge et al. 1979; Sabin-  
263 Feldman dye test: 2 of 11, Smith and Frenkel 1995; PCR: 3 of 19, Jokelainen and Nylund  
264 2012).

265  
266 *T. gondii* prevalence in Manitoba, in general, is not well known. To the best of our  
267 knowledge, no previous survey of *T. gondii* prevalence in squirrels exists from the province.  
268 Serological testing in 1981 reported that of 55,527 pregnant women 129 showed signs of a  
269 recent *T. gondii* infection (Sekla et al. 1981). The same study also reported that 19 of 72 cats  
270 and one polar bear tested positive for *T. gondii*, but results from 28 other species were all  
271 negative. An earlier study done in Manitoba in 1976 found that *T. gondii* prevalence in  
272 pregnant women in urban areas was 8.17 %, and 6.29 % in rural areas (Shettigara et al. 1976).  
273 The prevalence of *T. gondii* can be high in domestic sheep, pigs, and cattle (e.g., Tizard et al.

274 1978; Fayer 1981; however see Poljak et al. 2008), yet studies from Manitoba or  
275 Saskatchewan, another prairie province with a similar climate to Manitoba, have mostly found  
276 low prevalence (Nation and Allen 1976; Smith 1991).

277

278 The extreme climatic variations in the region may decrease the viability or infectivity of  
279 oocysts and tissue cysts in carcasses, therefore decreasing overall *T. gondii* prevalence in the  
280 area (Nation and Allen 1976). The temperature in Winnipeg between June to September can  
281 reach extremes of +30 °C to +35 °C (Environment Canada 2020b) with daily average  
282 temperatures varying from approximately +20 °C to +13 °C (Environment Canada 2020a). *T.*  
283 *gondii* oocysts are highly resistant to environmental variation but sporulation (i.e. infectivity)  
284 is dependent on fixed temperatures and factors such as soil moisture that can influence the  
285 time oocysts can survive at high temperatures (Dubey et al. 1970). Additionally, winters in  
286 Winnipeg can be cold and windy with extreme temperatures of -24 °C to -33 °C between  
287 January to March. Oocysts cannot sporulate and become infective after exposure to -21 °C  
288 for 1 day or -6 °C for 7 days (Frenkel et al. 1975). After sporulation, oocysts can withstand  
289 lower temperatures better, being able to survive at -21 °C for 28 days (Frenkel et al. 1975),  
290 yet oocysts can not sporulate if the conditions are unfavorable (Dubey et al. 1970). It is thus  
291 possible that the combination of hot summers and cold winters reduces the viability of oocysts  
292 in southern Manitoba. Contact rates between domestic cats and *T. gondii* intermediate hosts  
293 may also be lower during the winter in Manitoba as people keep their pets indoors in cold  
294 weather. Winnipeg has an average yearly precipitation of 521 mm, but the years 2018 and

295 2019 were unusually dry in southern Manitoba (Government of Manitoba 2020). This could  
296 have influenced oocyst survival in the area during data collection, as oocysts survive better in  
297 moist than in dry conditions (Frenkel et al. 1975; Lélou et al. 2012).

298

299 *T. gondii* is a cyst forming parasite and the distribution of *T. gondii* tissue cysts can be uneven  
300 and vary between organs (Elmore et al. 2016). This may influence the results from molecular  
301 methods, and the negative squirrels in our study may have had cysts in other tissues or at a  
302 concentration level below the detection limit of the PCR. The sensitivity and specificity of  
303 antibody detection methods can also vary—we used ELISA to detect serum antibodies to *T.*  
304 *gondii*, as this method generally has good sensitivity and specificity compared to other  
305 serological tests such as the modified agglutination test (Sharma et al. 2019a). As we sampled  
306 many different organs and tissues per individual by PCR and used serological methods as an  
307 additional test to survey *T. gondii* prevalence in squirrels our results are much less likely to be  
308 false negatives.

309

310 We note that *T. gondii* antibodies have been found in skunks (*Mephitis mephitis*) and  
311 raccoons (*Procyon lotor*) from Saskatchewan (modified agglutination test: average  
312 seroprevalence in skunks 15.6%; in raccoons 20.8% in 1999, 12.5% in 2000) and Manitoba  
313 (in skunks 28%; in raccoons 27.5%) (Hwang et al. 2007), which implies that although  
314 climatic variation may lower the prevalence of *T. gondii* in the prairie provinces of Canada, *T.*  
315 *gondii* is still present in the area. Nonetheless, our results in conjunction with previous studies

316 suggest that squirrels are often not important intermediate hosts of *T. gondii* in cities and that  
317 the prevalence of *T. gondii* oocysts in the environment in southern Manitoba and other prairie  
318 provinces is likely low. This knowledge is important as *T. gondii* infection dynamics in cities  
319 are relatively unknown, and no previous survey of *T. gondii* prevalence in Sciurids exists  
320 from Manitoba.

321

## 322 **MANAGEMENT IMPLICATIONS**

323 Cities are now the primary place where people, and our pets, interact with wildlife. Urban  
324 wildlife tends to occur in higher densities in cities than in natural habitats and this creates the  
325 possibility for increased parasite transmission. When wildlife parasites are a human health  
326 concern, such as with *T. gondii*, then management actions are warranted. Our results suggest  
327 that squirrels likely do not act as reservoirs for *T. gondii* in cities and therefore do not need to  
328 be considered as possible sources of infection to humans or their pet cats. Consequently, no  
329 management efforts are needed in cities with abundant squirrel populations.

330

## 331 **ACKNOWLEDGEMENTS**

332 We want to thank Dr. Neil Pople, Amanda Salo, Dr. Md Niaz Rahim, and other members of  
333 the Manitoba Veterinary Diagnostic Services Laboratory for their helpful guidance and data  
334 collection. We also want to thank Mitchell Green, Kyle Lefort, and Paul O'Brien for their help  
335 with necropsies, and Dr. Constance Finney for their excellent suggestions regarding the  
336 methods. This study was supported by a discovery grant of the Natural Sciences and



337 Engineering Research Council of Canada (NSERC) to CJG. RPK and CS were additionally  
338 supported by the University of Manitoba Graduate Fellowships and a University of Manitoba  
339 Graduate Enhancement of Tri-council funding grant to CJG.

340

#### 341 **LITERATURE CITED**

342 Afonso, E., P. Thulliez, D. Pontier, and E. Gilot-Fromont. 2007. Toxoplasmosis in prey  
343 species and consequences for prevalence in feral cats: Not all prey species are equal.  
344 *Parasitology*, 134(14):1963–1971, <https://doi.org/10.1017/S0031182007003320>.

345 Baker, P. J., S. E. Molony, E. Stone, I. C. Cuthill, and S. Harris. 2008. Cats about town: Is  
346 predation by free-ranging pet cats *Felis catus* likely to affect urban bird populations?  
347 *Ibis*, 150(SUPPL.1):86–99, <https://doi.org/10.1111/j.1474-919X.2008.00836.x>.

348 Ballash, G. A., J. P. Dubey, O. C. H. H. Kwok, A. B. Shoben, T. L. Robison, T. J. Kraft, and  
349 P. M. Dennis. 2015. Seroprevalence of *Toxoplasma gondii* in White-tailed deer  
350 (*Odocoileus virginianus*) and free-roaming cats (*Felis catus*) across a suburban to urban  
351 gradient in northeastern Ohio. *EcoHealth*, 12(2):359–367,  
352 <https://doi.org/10.1007/s10393-014-0975-2>.

353 Berdoy, M., J. P. Webster, and D. W. McDonald. 2000. Fatal attraction in rats infected with  
354 *Toxoplasma gondii*. *Proceedings of the Royal Society B: Biological Sciences*,  
355 267(1452):1591–1594, <https://doi.org/10.1098/rspb.2000.1182>.

356 Bradley, C. A., and S. Altizer. 2007. Urbanization and the ecology of wildlife diseases.

- 357 Trends in Ecology and Evolution, 22(2):95–102,  
358 <https://doi.org/10.1016/j.tree.2006.11.001>.
- 359 Burridge, M. J., W. J. Bigler, D. J. Forrester, and J. M. Hennemann. 1979. Serologic survey  
360 for *Toxoplasma gondii* in wild animals in Florida. Journal of the American Veterinary  
361 Medical Association, 175(9):964–967,.
- 362 Conrad, P. A., M. A. Miller, C. Kreuder, E. R. James, J. Mazet, H. Dabritz, D. A. Jessup, F.  
363 Gulland, and M. E. Grigg. 2005. Transmission of *Toxoplasma*: Clues from the study of  
364 sea otters as sentinels of *Toxoplasma gondii* flow into the marine environment.  
365 International Journal for Parasitology, 35(11–12):1155–1168,  
366 <https://doi.org/10.1016/j.ijpara.2005.07.002>.
- 367 De Craeye, S., N. Speybroeck, D. Ajzenberg, M. L. Dardé, F. Collinet, P. Tavernier, S. Van  
368 Gucht, P. Dorny, and K. Dierick. 2011. *Toxoplasma gondii* and *Neospora caninum* in  
369 wildlife: Common parasites in Belgian foxes and Cervidae? Veterinary Parasitology,  
370 178(1–2):64–69, <https://doi.org/10.1016/j.vetpar.2010.12.016>.
- 371 Deplazes, P., D. Heggin, S. Gloor, and T. Romig. 2004. Wilderness in the city: The  
372 urbanization of *Echinococcus multilocularis*. Trends in Parasitology, 20(2):77–84,  
373 <https://doi.org/10.1016/j.pt.2003.11.011>.
- 374 Dixon, B. R. 1992. Prevalence and control of toxoplasmosis - a Canadian perspective. Food  
375 Control, 3(2):68–75, [https://doi.org/10.1016/0956-7135\(92\)90034-8](https://doi.org/10.1016/0956-7135(92)90034-8).
- 376 Dubey, J. P. 2001. Oocyst shedding by cats fed isolated bradyzoites and comparison of

377 infectivity of bradyzoites of the VEG strain *Toxoplasma gondii* to cats and mice. *Journal*  
378 *of Parasitology*, 87(1):215–219, <https://doi.org/10.2307/3285204>.

379 Dubey, J. P., P. M. Dennis, S. K. Verma, S. Choudhary, L. R. Ferreira, S. Oliveira, O. C. H.  
380 Kwok, E. Butler, M. Carstensen, and C. Su. 2014. Epidemiology of toxoplasmosis in  
381 white tailed deer (*Odocoileus virginianus*): Occurrence, congenital transmission,  
382 correlates of infection, isolation, and genetic characterization of *Toxoplasma gondii*.  
383 *Veterinary Parasitology*, 202(3–4):270–275,  
384 <https://doi.org/10.1016/j.vetpar.2014.01.006>.

385 Dubey, J. P., and J. K. Frenkel. 1973. Experimental toxoplasma infection in mice with strains  
386 producing oocysts. *Journal of Parasitology*, 59(3):505–512,  
387 <https://doi.org/10.2307/3278784>.

388 Dubey, J. P., N. L. Miller, and J. K. Frenkel. 1970. The toxoplasma gondii oocyst from cat  
389 feces. *Journal of Experimental Medicine*, 132(4):636–662,  
390 <https://doi.org/10.1084/jem.132.4.636>.

391 Dubey, J. P., E. C. Hodgins, and A. N. Hamir. 2006. Acute Fatal Toxoplasmosis in Squirrels  
392 (*Sciurus carolinensis*) with Bradyzoites in Visceral Tissues. *Journal of Parasitology*,  
393 92(3):658–659, <https://doi.org/10.1645/GE-749R.1>.

394 Elmore, S. A., J. L. Jones, P. A. Conrad, S. Patton, D. S. Lindsay, and J. P. Dubey. 2010.  
395 *Toxoplasma gondii*: epidemiology, feline clinical aspects, and prevention. *Trends in*  
396 *Parasitology*, 26(4):190–196, <https://doi.org/10.1016/j.pt.2010.01.009>.

- 397 Elmore, S. A., K. P. Huyvaert, L. L. Bailey, A. Iqbal, C. Su, B. R. Dixon, R. T. Alisaukas, A.  
398 A. Gajadhar, and E. J. Jenkins. 2016. Multi-scale occupancy approach to estimate  
399 *Toxoplasma gondii* prevalence and detection probability in tissues: an application and  
400 guide for field sampling. *International Journal for Parasitology*, 46(9):563–570,  
401 <https://doi.org/10.1016/j.ijpara.2016.04.003>.
- 402 Environment Canada. 2020. Canadian Climate Normals 1981–2010 Station Data for  
403 Winnipeg. Retrieved February 20, 2020.  
404 [https://climate.weather.gc.ca/climate\\_normals/results\\_1981\\_2010\\_e.html](https://climate.weather.gc.ca/climate_normals/results_1981_2010_e.html).
- 405 Environment Canada. 2020. Monthly Data Report for 2007 for Winnipeg The Forks,  
406 Manitoba. Retrieved January 30, 2020.  
407 [https://climate.weather.gc.ca/climate\\_data/monthly\\_data\\_e.html](https://climate.weather.gc.ca/climate_data/monthly_data_e.html).
- 408 Fayer, R. 1981. Toxoplasmosis update and public health implications. *Canadian Veterinary*  
409 *Journal*, 22(11):344–352,.
- 410 Fayyad, A., M. Kummerfeld, I. Davina, P. Wohlsein, A. Beineke, W. Baumgärtner, and C.  
411 Puff. 2016. Fatal systemic *Toxoplasma gondii* infection in a red squirrel (*Sciurus*  
412 *vulgaris*), a Swinhoe’s striped squirrel (*Tamias swinhoei*) and a New World porcupine  
413 (*Erethizontidae* sp.). *Journal of Comparative Pathology*, 154(2–3):263–267,  
414 <https://doi.org/10.1016/j.jcpa.2016.02.002>.
- 415 Frenkel, J. K., A. Ruiz, and M. Chinchilla. 1975. Soil survival of *Toxoplasma* oocysts in  
416 Kansas and Costa Rica. *American Journal of Tropical Medicine and Hygiene*,

- 417 24(3):439–443, <https://doi.org/10.4269/ajtmh.1975.24.439>.
- 418 Frenkel, J. K., K. M. Hassanein, R. S. Hassanein, E. Brown, P. Thulliez, and R. Quintero-  
419 Nunez. 1995. Transmission of *Toxoplasma gondii* in Panama City, Panama: A five-year  
420 prospective cohort study of children, cats, rodents, birds, and soil. *American Journal of*  
421 *Tropical Medicine and Hygiene*, 53(5):458–468,  
422 <https://doi.org/10.4269/ajtmh.1995.53.458>.
- 423 Galeh, T. M., S. Sarvi, M. Montazeri, M. Moosazadeh, M. Nakhaei, S. A. Shariatzadeh, and  
424 A. Daryani. 2020. Global status of *Toxoplasma gondii* seroprevalence in rodents: A  
425 systematic review and meta-analysis. *Frontiers in Veterinary Science*, 7:461,  
426 <https://doi.org/10.3389/fvets.2020.00461>.
- 427 Gilbert, A. T., A. R. Fooks, D. T. S. Hayman, D. L. Horton, T. Müller, R. Plowright, A. J.  
428 Peel, R. Bowen, J. L. N. Wood, J. Mills, A. A. Cunningham, and C. E. Rupprecht. 2013.  
429 Deciphering serology to understand the ecology of infectious diseases in wildlife.  
430 *EcoHealth*, 10(3):298–313, <https://doi.org/10.1007/s10393-013-0856-0>.
- 431 Giraudeau, M., M. Mousel, S. Earl, and K. McGraw. 2014. Parasites in the city: Degree of  
432 urbanization predicts poxvirus and coccidian infections in house finches (*Haemorrhous*  
433 *mexicanus*). *PLoS ONE*, 9(2) <https://doi.org/10.1371/journal.pone.0086747>.
- 434 Gliwicz, J., J. Goszczynski, and M. Luniak. 1994. Characteristic features of animal  
435 populations under synurbanization - the case of the blackbird and of the striped field  
436 mouse. *Memorabilia Zoologica*, 49:237–244,.

- 437 Government of Manitoba. 2020. Manitoba Drought Management Strategy. Retrieved January  
438 20, 2020. [https://www.gov.mb.ca/sd/water/drought\\_condition/index.html](https://www.gov.mb.ca/sd/water/drought_condition/index.html).
- 439 Hill, D. E., S. Chirukandoth, and J. P. Dubey. 2005. Biology and epidemiology of  
440 *Toxoplasma gondii* in man and animals. *Animal Health Research Reviews*, 6(1):41–61,  
441 <https://doi.org/10.1079/ahr2005100>.
- 442 Hirota, J., H. Nishi, H. Matsuda, H. Tsunemitsu, and S. Shimizu. 2010. Cross-reactivity of  
443 Japanese encephalitis virus-vaccinated horse sera in serodiagnosis of West Nile Virus.  
444 *Journal of Veterinary Medical Science*, 72(3):369–372, [https://doi.org/10.1292/jvms.09-](https://doi.org/10.1292/jvms.09-0311)  
445 0311.
- 446 Hwang, Y. T., J. A. Pitt, T. W. Quirk, and J. P. Dubey. 2007. Seroprevalence of *Toxoplasma*  
447 *gondii* in mesocarnivores of the Canadian prairies. *Journal of Parasitology*, 93(6):1370–  
448 1373, <https://doi.org/10.1645/GE-1319.1>.
- 449 Jacobs, L., A. M. Stanley, and C. M. Herman. 1962. Prevalence of *Toxoplasma* antibodies in  
450 rabbits, squirrels, and raccoons collected in and near the Patuxent Wildlife Research  
451 Center. *The Journal of Parasitology*, 48(4):550, <https://doi.org/10.2307/3274906>.
- 452 Jokelainen, P., and M. Nylund. 2012. Acute fatal Toxoplasmosis in three Eurasian Red  
453 Squirrels (*Sciurus vulgaris*) caused by genotype II of *Toxoplasma gondii*. *Journal of*  
454 *Wildlife Diseases*, 48(2):454–457, <https://doi.org/10.7589/0090-3558-48.2.454>.
- 455 Lehrer, E. W., S. L. Fredebaugh, R. L. Schooley, and N. E. Mateus-Pinilla. 2010. Prevalence  
456 of antibodies to *Toxoplasma gondii* in woodchucks across an urban-rural gradient.

- 457 Journal of Wildlife Diseases, 46(3):977–980, <https://doi.org/10.7589/0090-3558->  
458 46.3.977.
- 459 Lélou, M., I. Villena, M. L. Dardé, D. Aubert, R. Geers, E. Dupuis, F. Marnef, M. L. Poulle, C.  
460 Gotteland, A. Dumètre, and E. Gilot-Fromonta. 2012. Quantitative estimation of the  
461 viability of *Toxoplasma gondii* oocysts in soil. *Applied and Environmental*  
462 *Microbiology*, 78(15):5127–5132, <https://doi.org/10.1128/AEM.00246-12>.
- 463 Lindsay, D. S., J. L. Weston, and S. E. Little. 2001. Prevalence of antibodies to *Neospora*  
464 *caninum* and *Toxoplasma gondii* in gray foxes (*Urocyon cinereoargenteus*) from South  
465 Carolina. *Veterinary Parasitology*, 97(2):159–164, <https://doi.org/10.1016/S0304->  
466 4017(01)00390-9.
- 467 Mackenstedt, U., D. Jenkins, and T. Romig. 2015. The role of wildlife in the transmission of  
468 parasitic zoonoses in peri-urban and urban areas. *International Journal for Parasitology:*  
469 *Parasites and Wildlife*, 4(1):71–79, <https://doi.org/10.1016/j.ijppaw.2015.01.006>.
- 470 Mercier, A., M. Garba, H. Bonnabau, M. Kane, J. P. Rossi, M. L. Dardé, and G. Dobigny.  
471 2013. Toxoplasmosis seroprevalence in urban rodents: A survey in Niamey, Niger.  
472 *Memorias Do Instituto Oswaldo Cruz*, 108(4):399–407, <https://doi.org/10.1590/S0074->  
473 0276108042013002.
- 474 Murphy, R. G., R. H. Williams, J. M. Hughes, G. Hide, N. J. Ford, and D. J. Oldbury. 2008.  
475 The urban house mouse (*Mus domesticus*) as a reservoir of infection for the human  
476 parasite *Toxoplasma gondii*: An unrecognised public health issue? *International Journal*

- 477 of Environmental Health Research, 18(3):177–185,  
478 <https://doi.org/10.1080/09603120701540856>.
- 479 Nation, P. N., and J. R. Allen. 1976. Antibodies to *Toxoplasma gondii* in Saskatchewan cats,  
480 sheep and cattle. *Canadian Veterinary Journal*, 17(12):308–310,.
- 481 Opsteegh, M., M. Langelaar, H. Sprong, L. den Hartog, S. De Craeye, G. Bokken, D.  
482 Ajzenberg, A. Kijlstra, and J. van der Giessen. 2010. Direct detection and genotyping of  
483 *Toxoplasma gondii* in meat samples using magnetic capture and PCR. *International*  
484 *Journal of Food Microbiology*, 139(3):193–201,  
485 <https://doi.org/10.1016/j.ijfoodmicro.2010.02.027>.
- 486 Pappas, G., N. Roussos, and M. E. Falagas. 2009. Toxoplasmosis snapshots: Global status of  
487 *Toxoplasma gondii* seroprevalence and implications for pregnancy and congenital  
488 toxoplasmosis. *International Journal for Parasitology*, 39(12):1385–1394,  
489 <https://doi.org/10.1016/j.ijpara.2009.04.003>.
- 490 Parker, T. S., and C. H. Nilon. 2008. Gray squirrel density, habitat suitability, and behavior in  
491 urban parks. *Urban Ecosystems*, 11(3):243–255, [https://doi.org/10.1007/s11252-008-](https://doi.org/10.1007/s11252-008-0060-0)  
492 0060-0.
- 493 Poljak, Z., C. E. Dewey, R. M. Friendship, S. W. Martin, J. Christensen, D. Ojkic, J. Wu, and  
494 E. Chow. 2008. Pig and herd level prevalence of *Toxoplasma gondii* in Ontario finisher  
495 pigs in 2001, 2003, and 2004. *Canadian Journal of Veterinary Research*, 72(4):303–10,.
- 496 Reperant, L. A., D. Hegglin, I. Tanner, C. Fischer, and P. Deplazes. 2009. Rodents as shared



- 497 indicators for zoonotic parasites of carnivores in urban environments. *Parasitology*,  
498 136(3):329–337, <https://doi.org/10.1017/S0031182008005428>.
- 499 Roqueplo, C., L. Halos, O. Cabre, and B. Davoust. 2011. *Toxoplasma gondii* in wild and  
500 domestic animals from New Caledonia. *Parasite*, 18(4):345–348,  
501 <https://doi.org/10.1051/parasite/2011184345>.
- 502 Sekla, L., W. Stackiw, and S. Rodgers. 1981. A serosurvey of toxoplasmosis in Manitoba.  
503 *Canadian Journal of Public Health*, 72(2):111–117,.
- 504 Sharma, R., S. Parker, B. Al-Adhami, N. Bachand, and E. Jenkins. 2019a. Comparison of  
505 tissues (heart vs. brain) and serological tests (MAT, ELISA and IFAT) for detection of  
506 *Toxoplasma gondii* in naturally infected wolverines (*Gulo gulo*) from the Yukon,  
507 Canada. *Food and Waterborne Parasitology*, 15:e00046,  
508 <https://doi.org/10.1016/j.fawpar.2019.e00046>.
- 509 Sharma, R., S. Parker, B. Elkin, R. Mulders, M. Branigan, J. Pongracz, D. L. Godson, N. C.  
510 Larter, and E. Jenkins. 2019b. Risk factors and prevalence of antibodies for *Toxoplasma*  
511 *gondii* in diaphragmatic fluid in wolverines (*Gulo gulo*) from the Northwest Territories,  
512 Canada. *Food and Waterborne Parasitology*, 15:e00056,  
513 <https://doi.org/10.1016/j.fawpar.2019.e00056>.
- 514 Shettigara, P. T., N. W. Choi, and H. A. H. Abu-Zeid. 1976. Prevalence of toxoplasmosis in  
515 Manitoba province: a seroepidemiologic study of 23 146 prenatal sera. *American Journal*  
516 *of Epidemiology*, 104(3):340–340,.

- 517 Sims, V., K. L. Evans, S. E. Newson, J. A. Tratalos, and K. J. Gaston. 2008. Avian  
518 assemblage structure and domestic cat densities in urban environments. *Diversity and*  
519 *Distributions*, <https://doi.org/10.1111/j.1472-4642.2007.00444.x>.
- 520 Smith, D. D., and J. K. Frenkel. 1995. Prevalence of antibodies to *Toxoplasma gondii* in wild  
521 mammals of Missouri and east central Kansas: biologic and ecologic considerations of  
522 transmission. *Journal of Wildlife Diseases*, 31(1):15–21, [https://doi.org/10.7589/0090-](https://doi.org/10.7589/0090-3558-31.1.15)  
523 [3558-31.1.15](https://doi.org/10.7589/0090-3558-31.1.15).
- 524 Smith, H. J. 1991. Seroprevalence of anti-*Toxoplasma* IgG in Canadian swine. *Canadian*  
525 *Journal of Veterinary Research*, 55(4):380–1,.
- 526 Soave, O. A., and E. H. Lennette. 1959. Naturally acquired toxoplasmosis in the gray squirrel,  
527 *sciurus griseus*, and its bearing on the laboratory diagnosis of rabies. *The Journal of*  
528 *Laboratory and Clinical Medicine*, 53(1):163–166,  
529 <https://doi.org/10.5555/uri:pii:0022214359900642>.
- 530 Statistics Canada. 2016. Winnipeg, CY, Manitoba. Census Profile. 2016 Census. Statistics  
531 Canada Catalogue no. 98-316-X2016001. Retrieved July 30, 2020.  
532 <https://www12.statcan.gc.ca>.
- 533 Tenter, A. M., A. R. Heckerroth, and L. M. Weiss. 2000. *Toxoplasma gondii*: From animals to  
534 humans. *International Journal for Parasitology*, 30(12–13):1217–1258,  
535 [https://doi.org/10.1016/S0020-7519\(00\)00124-7](https://doi.org/10.1016/S0020-7519(00)00124-7).
- 536 Tizard, I. R., J. Harmeson, and C. H. Lai. 1978. The prevalence of serum antibodies to

- 537           Toxoplasma gondii in Ontario mammals. Canadian Journal of Comparative Medicine :  
538           Revue Canadienne de Medecine Comparee, 42(2):177–83,.
- 539   Walton, B. C., and K. W. Walls. 1964. Prevalence of toxoplasmosis in wild animals from Fort  
540           Stewart, Georgia, as indicated by serological tests and mouse inoculation. The American  
541           Journal of Tropical Medicine and Hygiene, 13(4):530–533,  
542           <https://doi.org/10.4269/ajtmh.1964.13.530>.
- 543   Wanha, K., R. Edelhofer, C. Gabler-Eduardo, and H. Prosl. 2005. Prevalence of antibodies  
544           against Neospora caninum and Toxoplasma gondii in dogs and foxes in Austria.  
545           Veterinary Parasitology, 128(3–4):189–193,  
546           <https://doi.org/10.1016/j.vetpar.2004.11.027>.
- 547
- 548

549 **FIGURES AND CAPTIONS**

550

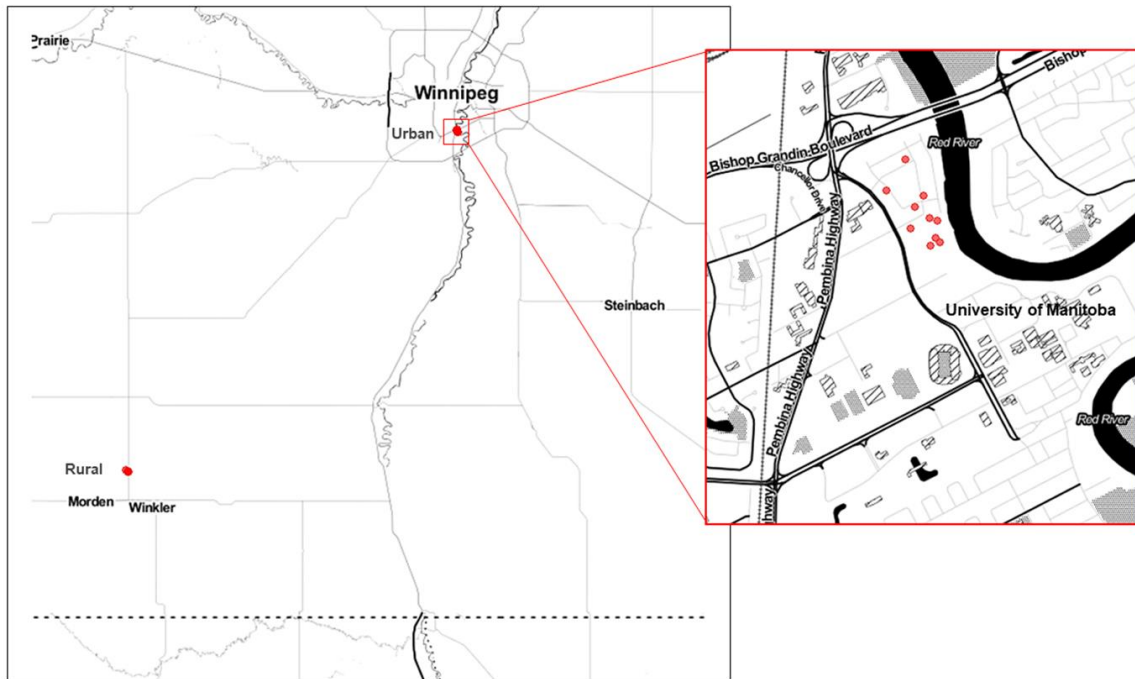

551

552 Figure 1. Map of the urban and rural squirrel study sites in southern Manitoba, Canada. Blood  
553 was collected from red and grey squirrels from these sites for serological testing of  
554 *Toxoplasma gondii* antibodies. The close-up (framed red) shows the 10 urban trapping  
555 locations next to the University of Manitoba campus.

556

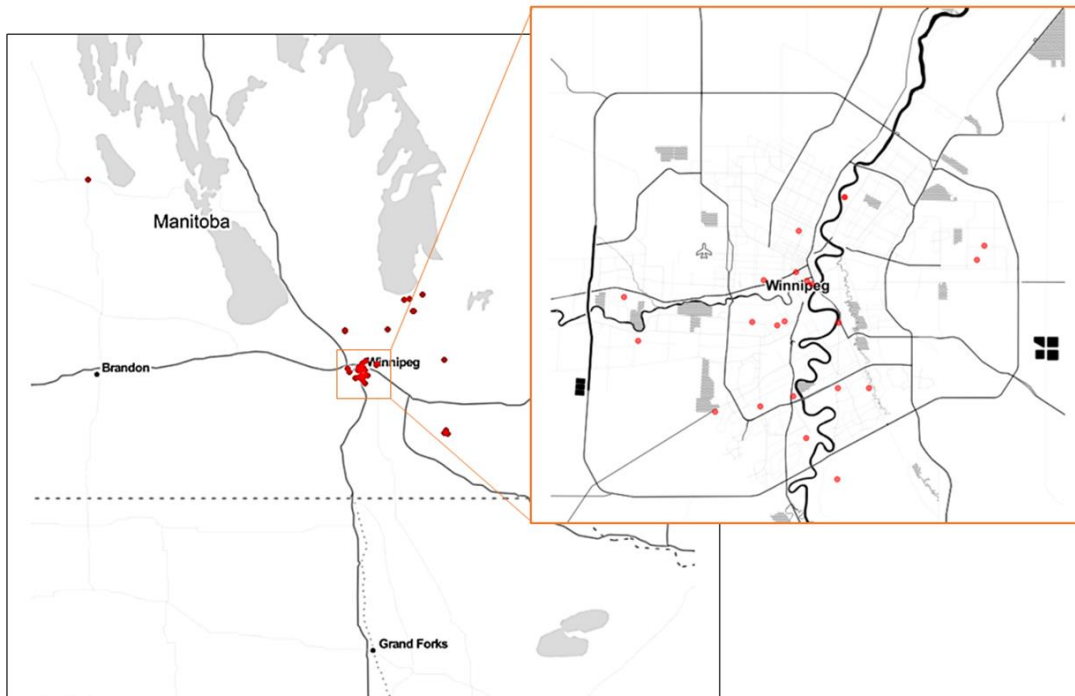

557

558 Figure 2. Map showing the sampling locations of squirrel (*Sciuridae*) carcasses used to collect  
559 tissue samples for quantitative PCR detection of *Toxoplasma gondii*. The large map (on the left)  
560 shows the urban and rural locations of squirrels from in and around the city of Winnipeg,  
561 Manitoba, Canada, and the small map (framed orange) is a close up of the urban locations within  
562 the city perimeter.

563
